# Supplementary material
Source: publisher figshare collection journal article supplement (https://acs.figshare.com/ndownloader/files/3801604)
Supplement: Supplementary file 1 [file 3801604]

**Supporting Information for**

*Increased Turnover at Limiting O<sub>2</sub>  
Concentrations by the Thr<sup>387</sup> → Ala Variant of  
the HIF-Prolyl Hydroxylase PHD2*

*Serap Pektas,<sup>1</sup> Cornelius Y. Taabazuing,<sup>1</sup> Michael J. Knapp<sup>1\*</sup>*

<sup>1</sup> Department of Chemistry, University of Massachusetts, Amherst, MA 01003,  
United States

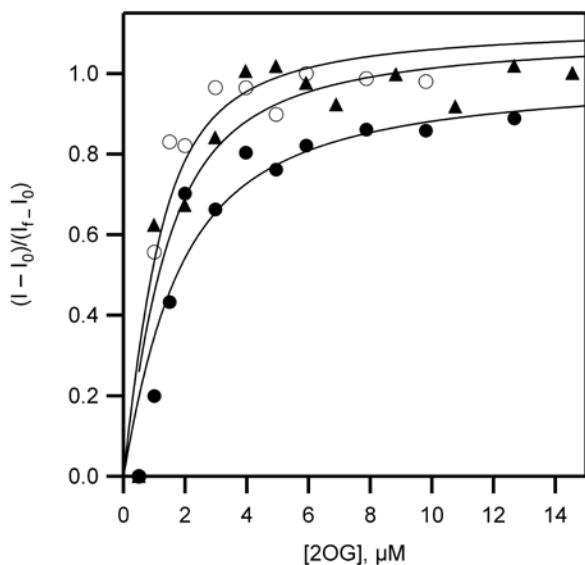

**Figure S1.** Determination of  $K_{D(2OG)}$  for WT-PHD2, Thr<sup>387</sup>→Ala, and Thr<sup>387</sup>→Asn upon intrinsic fluorescence quenching of tryptophan upon binding of 2OG to the enzyme active site. Closed circles WT-PHD2 (1.1  $\mu\text{M}$ ), open circles Thr<sup>387</sup>→Ala (1  $\mu\text{M}$ ), triangles Thr<sup>387</sup>→Asn (1.1  $\mu\text{M}$ ), each with MnSO<sub>4</sub> (20  $\mu\text{M}$ ) in 50 mM HEPES pH 7.00 titrated with 2OG (500  $\mu\text{M}$ ).
